# Supplementary material for: Jana2020 – a new version of the crystallographic computing system Jana
Source: publisher site journal article supplement (doi:10.1515/zkri-2023-0005), 2023-04-26

T-animation of the structure [CH3NH3][Ni(COOH)3 in which coexistence of incommensurate nuclear and magnetic modulations has been detected.

Cañadillas-Delgado, L., Mazzuca, L., Fabelo, O., Rodríguez-Carvajal, J. & Petříček, V. (2020). *Inorg. Chem.* **59**, 17896–17905


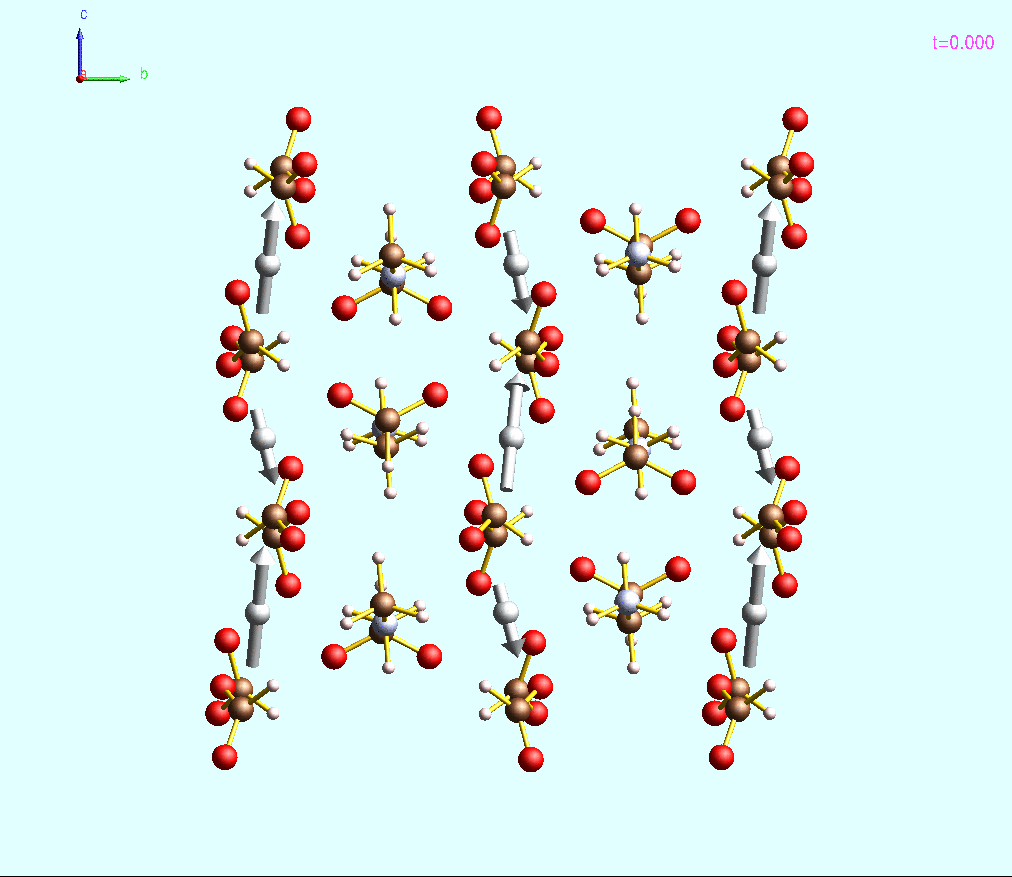

Supplement: Supplementary file 1 [file j_zkri-2023-0005_suppl.docx]
